# Supplementary material for: New regulators of the tetracycline‐inducible gene expression system identified by chemical and genetic screens
Source: PubMed Central journal article supplement (PMC9527584; doi:10.1002/2211-5463.13482), 2022-09-11
Supplement: FEB4-12-1896-s001.pdf [file FEB4-12-1896-s001.pdf]

**Table S1. List of compounds rescuing the viability of TDP-43<sup>EGFP</sup> overexpressing cells.**

| Compound ID | Batch ID  | Library                         | Compound Name                             | Therapeutic class                                                                                                       | Normalised nuclei count | Standard deviation | Normalised nuclei count Neg CTR | Standard deviation | Normalised nuclei count Pos CTR | Standard deviation | Z-score  |
|-------------|-----------|---------------------------------|-------------------------------------------|-------------------------------------------------------------------------------------------------------------------------|-------------------------|--------------------|---------------------------------|--------------------|---------------------------------|--------------------|----------|
| CBK041816C  | BJ1834168 | Enzo                            | Loperamide-HCl                            | Ca2+ Blocker                                                                                                            | 47,12791039             | 2,812351           | 29,12312822                     | 2,0274601          | 100                             | 4,5146193          | 3,015705 |
| CBK041816C  | BJ1834412 | Enzo                            | Loperamide-HCl                            | Calcium channel                                                                                                         | 44,26219218             | 2,616922           | 27,76060287                     | 2,0364995          | 100                             | 3,9336966          | 3,436632 |
| CBK290434   | BJ1834409 | Enzo                            | Niguldipine                               | Calcium channel                                                                                                         | 40,93674741             | 3,180713           | 27,76060287                     | 2,0364995          | 100                             | 3,9336966          | 2,751556 |
| CBK041816C  | BA1064144 | Prestwick                       | Loperamide hydrochloride                  | Gastroenterology                                                                                                        | 38,92630139             | 2,122018           | 26,93567388                     | 0,9074579          | 100                             | 6,8693939          | 4,310168 |
| CBK041816C  | BJ1836074 | Tocris mini                     | Loperamide hydrochloride                  | Peripherally acting $\mu$ agonist. Also Ca2+ channel blocker                                                            | 36,33694847             | 4,237543           | 25,17787127                     | 1,2983054          | 100                             | 4,3807581          | 3,312059 |
| CBK290997C  | BJ1856299 | Selleck-known kinase inhibitors | PRT062607 (P505-15, PRT2607, BIIB057) HCl | Syk                                                                                                                     | 50,94246682             | 6,531776           | 36,20660095                     | 1,7398738          | 100                             | 3,1376512          | 2,399776 |
| CBK289895   | BJ1834423 | Enzo                            | Penitrem A                                | Potassium channel                                                                                                       | 38,3510138              | 4,405175           | 27,76060287                     | 2,0364995          | 100                             | 3,9336966          | 2,168616 |
| CBK289950G  | BJ1835073 | Tocris mini                     | Dihydroergocristine mesylate              | Partial $\alpha$ agonist. Non-selective                                                                                 | 51,14583269             | 2,188903           | 37,22406109                     | 1,7101686          | 100                             | 4,5725361          | 3,49016  |
| CBK200761   | BJ1838560 | Selleck tool compounds          | Mometasone furoate                        | NA                                                                                                                      | 51,66129052             | 2,753683           | 38,86857778                     | 2,0855832          | 100                             | 3,6186737          | 2,446069 |
| CBK200761   | BA1064572 | Prestwick                       | Mometasone furoate                        | Endocrinology                                                                                                           | 35,8651244              | 0,482834           | 27,25249107                     | 1,6723928          | 100                             | 4,0592056          | 3,366255 |
| CBK289955   | BJ1835139 | Tocris mini                     | TPCA-1                                    | Potent, selective inhibitor of IKK-2                                                                                    | 48,27023492             | 0,894071           | 37,22406109                     | 1,7101686          | 100                             | 4,5725361          | 2,731804 |
| CBK200701G  | BJ1835054 | Tocris mini                     | Bromocriptine mesylate                    | Selective D2-like agonist                                                                                               | 47,66512828             | 2,020484           | 37,22406109                     | 1,7101686          | 100                             | 4,5725361          | 2,559436 |
| CBK041149C  | BJ1835374 | Tocris mini                     | (R)-(-)-Niguldipine hydrochloride         | $\alpha$ 1 antagonist, L-type Ca2+ channel blocker. Less active enantiomer of Niguldipine hydrochloride (Cat. No. 1123) | 47,60458671             | 2,163254           | 37,22406109                     | 1,7101686          | 100                             | 4,5725361          | 2,531613 |
| CBK041149C  | BJ1835373 | Tocris mini                     | (S)-(+)-Niguldipine hydrochloride         | $\alpha$ 1 antagonist, L-type Ca2+ channel blocker                                                                      | 46,48957357             | 2,075105           | 37,22406109                     | 1,7101686          | 100                             | 4,5725361          | 2,251765 |
| CBK200509   | BA1064781 | Prestwick                       | Clobetasol propionate                     | Metabolism                                                                                                              | 34,03529109             | 0,858184           | 27,25249107                     | 1,6723928          | 100                             | 4,0592056          | 2,647472 |
| CBK016912   | BA1064702 | Prestwick                       | Succinylsulfathiazole                     | Infectiology                                                                                                            | 33,22835406             | 2,782178           | 27,25249107                     | 1,6723928          | 100                             | 4,0592056          | 2,387994 |
| CBK200868   | BJ1835649 | Tocris mini                     | Fluticasone propionate                    | Selective high affinity glucocorticoid agonist                                                                          | 31,64975049             | 2,58535            | 26,37414799                     | 1,2533473          | 100                             | 5,9417387          | 2,016654 |

**Table S2. Compound abbreviations.**

| <b>Compound</b>              | <b>Abbreviation</b> |
|------------------------------|---------------------|
| Loperamide HCl               | Lop                 |
| Niguldipine                  | Nig                 |
| Bromocriptine mesylate       | BrM                 |
| Mometasone furoate           | MoF                 |
| Fluticasone propionate       | FIP                 |
| Clobetasol propionate        | CIP                 |
| Penitrem A                   | PeA                 |
| Dihydroergocristine mesylate | DiM                 |
| (R)-(-)-Niguldipine HCl      | R-Nig               |
| PRT062607 HCl                | PRT                 |
| Doxycycline -                | No-Dox              |
| Doxycycline +                | Dox                 |

**Table S3. Source of reagents.**

| REAGENT or RESOURCE                                  | SOURCE                                                             | IDENTIFIER          |
|------------------------------------------------------|--------------------------------------------------------------------|---------------------|
| <b>Antibodies</b>                                    |                                                                    |                     |
| TDP-43                                               | Abcam                                                              | Cat# Ab41881        |
| TRIM28                                               | Abcam                                                              | Cat# Ab22553        |
| PARP1                                                | Cell Signalling                                                    | Cat# 9542           |
| $\beta$ -actin                                       | Abcam                                                              | Cat# Ab13822        |
| Vinculin                                             | Abcam                                                              | Cat# Ab129002       |
| PR repeats                                           | Proteintech                                                        | Cat# 23979-1-AP     |
| ATXN2                                                | BD Biosciences                                                     | Cat# 611378         |
| Anti-rabbit Alexafluor 647                           | Invitrogen                                                         | Cat# A32733         |
| Anti-mouse Alexafluor 647                            | Invitrogen                                                         | Cat# A32728         |
| <b>Bacterial and virus strains</b>                   |                                                                    |                     |
| Brunello-UMI-virus                                   | CustomArray,<br>Genscript                                          |                     |
| pLenti-Cas9-T2A-Blast-BFP                            | derived from lenti-<br>dCAS9-VP64_Blast, a<br>gift from Feng Zhang | Addgene #61425      |
| <b>Chemicals, peptides, and recombinant proteins</b> |                                                                    |                     |
| Doxycycline hyclate                                  | Sigma-Aldrich                                                      | Cat# D9891          |
| Tetracycline hydrochloride                           | Sigma-Aldrich                                                      | Cat# T7660          |
| Mometasone furoate                                   | Sigma-Aldrich                                                      | Cat# M4074          |
| BIX01294 trihydrochloride hydrate                    | Sigma-Aldrich                                                      | Cat# B9311          |
| Loperamide hydrochloride                             | Enzo Life Sciences                                                 | Cat# ALX-550-253    |
| Niguldipine hydrochloride                            | Enzo Life Sciences                                                 | Cat# BML-CA216      |
| Bromocriptine mesylate                               | Tocris                                                             | Cat# 0427           |
| Zeocin                                               | Thermo Fisher                                                      | Cat# R25001         |
| Blasticidin                                          | Thermo Fisher                                                      | Cat# R21001         |
| Hoechst 33342                                        | Sigma-Aldrich                                                      | Cat# 14533          |
| <b>Critical commercial assays</b>                    |                                                                    |                     |
| PureLink™ RNA mini kit                               | Invitrogen                                                         | Cat# 12183018A      |
| SYBR® Green RNA-to-CT™ 1-Step Kit                    | Thermo Fisher                                                      | Cat# 4389986        |
| Lipofectamine 3000                                   | Thermo Fisher                                                      | Cat# L300015        |
| Lipofectamine 2000                                   | Thermo Fisher                                                      | Cat# 11668019       |
| <b>Experimental models: Cell lines</b>               |                                                                    |                     |
| T-Rex U2OS                                           | Kind gift from Steve<br>Jackson Laboratory                         | N/A                 |
| hTERT RPE-1                                          | ATCC                                                               | Cat# CRL-4000       |
| <b>Oligonucleotides</b>                              |                                                                    |                     |
| ATXN2 F 5' - CCCAGCAGCACAACAG - 3'                   | Sigma-Aldrich                                                      | N/A                 |
| ATXN2 R 5' - ATGTGGGGTGGGTTGG - 3'                   | Sigma-Aldrich                                                      | N/A                 |
| EGFP F 5' - CTACCCCGACCACATGAAGC - 3'                | Sigma-Aldrich                                                      | N/A                 |
| EGFP R 5' - AAGAAGATGGTGCGCTCCTG - 3'                | Sigma-Aldrich                                                      | N/A                 |
| PR97 F 5' - CTAGGCCAAGACCCCGAAC - 3'                 | Sigma-Aldrich                                                      | N/A                 |
| PR97 R 5' - TGCTACACGGTCTAATGCGA - 3'                | Sigma-Aldrich                                                      | N/A                 |
| GAPDH F 5' - TGCACCACCAACTGCTTAG - 3'                | Sigma-Aldrich                                                      | N/A                 |
| GAPDH R 5' - GGATGCAGGGATGATGTTTC - 3'               | Sigma-Aldrich                                                      | N/A                 |
| crRNA TRIM28 TACCAGTAGAGCGCACAGTA                    | Horizon                                                            | Cat# CM-005046-01   |
| tracrRNA                                             | Horizon                                                            | Cat# U-002005-05    |
| sgRNA ATXN2 AATCTATGCAAATATGAGGA                     | Sigma-Aldrich                                                      | Shalem et al., 2014 |
| <b>Recombinant DNA</b>                               |                                                                    |                     |

|                                |                                      |                               |
|--------------------------------|--------------------------------------|-------------------------------|
| pINTO-C-FH                     | Kind gift from Emilio Lecona         | N/A                           |
| pEGFP-C1                       | Kind gift from Tatiana Shelkownikova | Clontech, 6084-1              |
| pEGFP-wtTDP-43                 | Kind gift from Tatiana Shelkownikova | N/A                           |
| pINTO-EGFP                     | This paper                           | N/A                           |
| pINTO-wtTDP-43 <sup>EGFP</sup> | This paper                           | N/A                           |
| pINTO-(PR) <sub>97</sub>       | This paper                           | N/A                           |
| pcDNA-HA-ATXN2                 | Kind gift from Daisuke Ito           | N/A                           |
| Rosa-BleoR-TetON-Snap          | This paper                           | N/A                           |
| Rosa-BleoR- TetON-SnapATXN2wt  | This paper                           | N/A                           |
| pSpCas9(BB)-2A-GFP (pX458)     | Addgene                              | Cat# 48138                    |
| Software and algorithms        |                                      |                               |
| GraphPad Prism 9               | Graphpad Software Inc.               | <a href="#">GraphPad</a>      |
| Cell Profiler                  | Kamentsky <i>et al.</i> 2011         | <a href="#">Cell Profiler</a> |
| Image J                        | Schneider <i>et al.</i> 2012         | <a href="#">ImageJ</a>        |
| KNIME                          | Berthold <i>et al.</i> 2007          | <a href="#">KNIME</a>         |
| MaGeCK                         | Li <i>et al.</i> 2014                | N/A                           |
| UMI lineage dropout            | Schmierer <i>et al.</i> 2017         | N/A                           |
| STRING                         | Szklarczyk <i>et al.</i> 2018        | <a href="#">STRING</a>        |
